# Supplementary material
Source: publisher figshare collection journal article supplement (https://gsapubs.figshare.com/ndownloader/files/22398855)
Supplement: Supplementary file 1 [file 22398855]

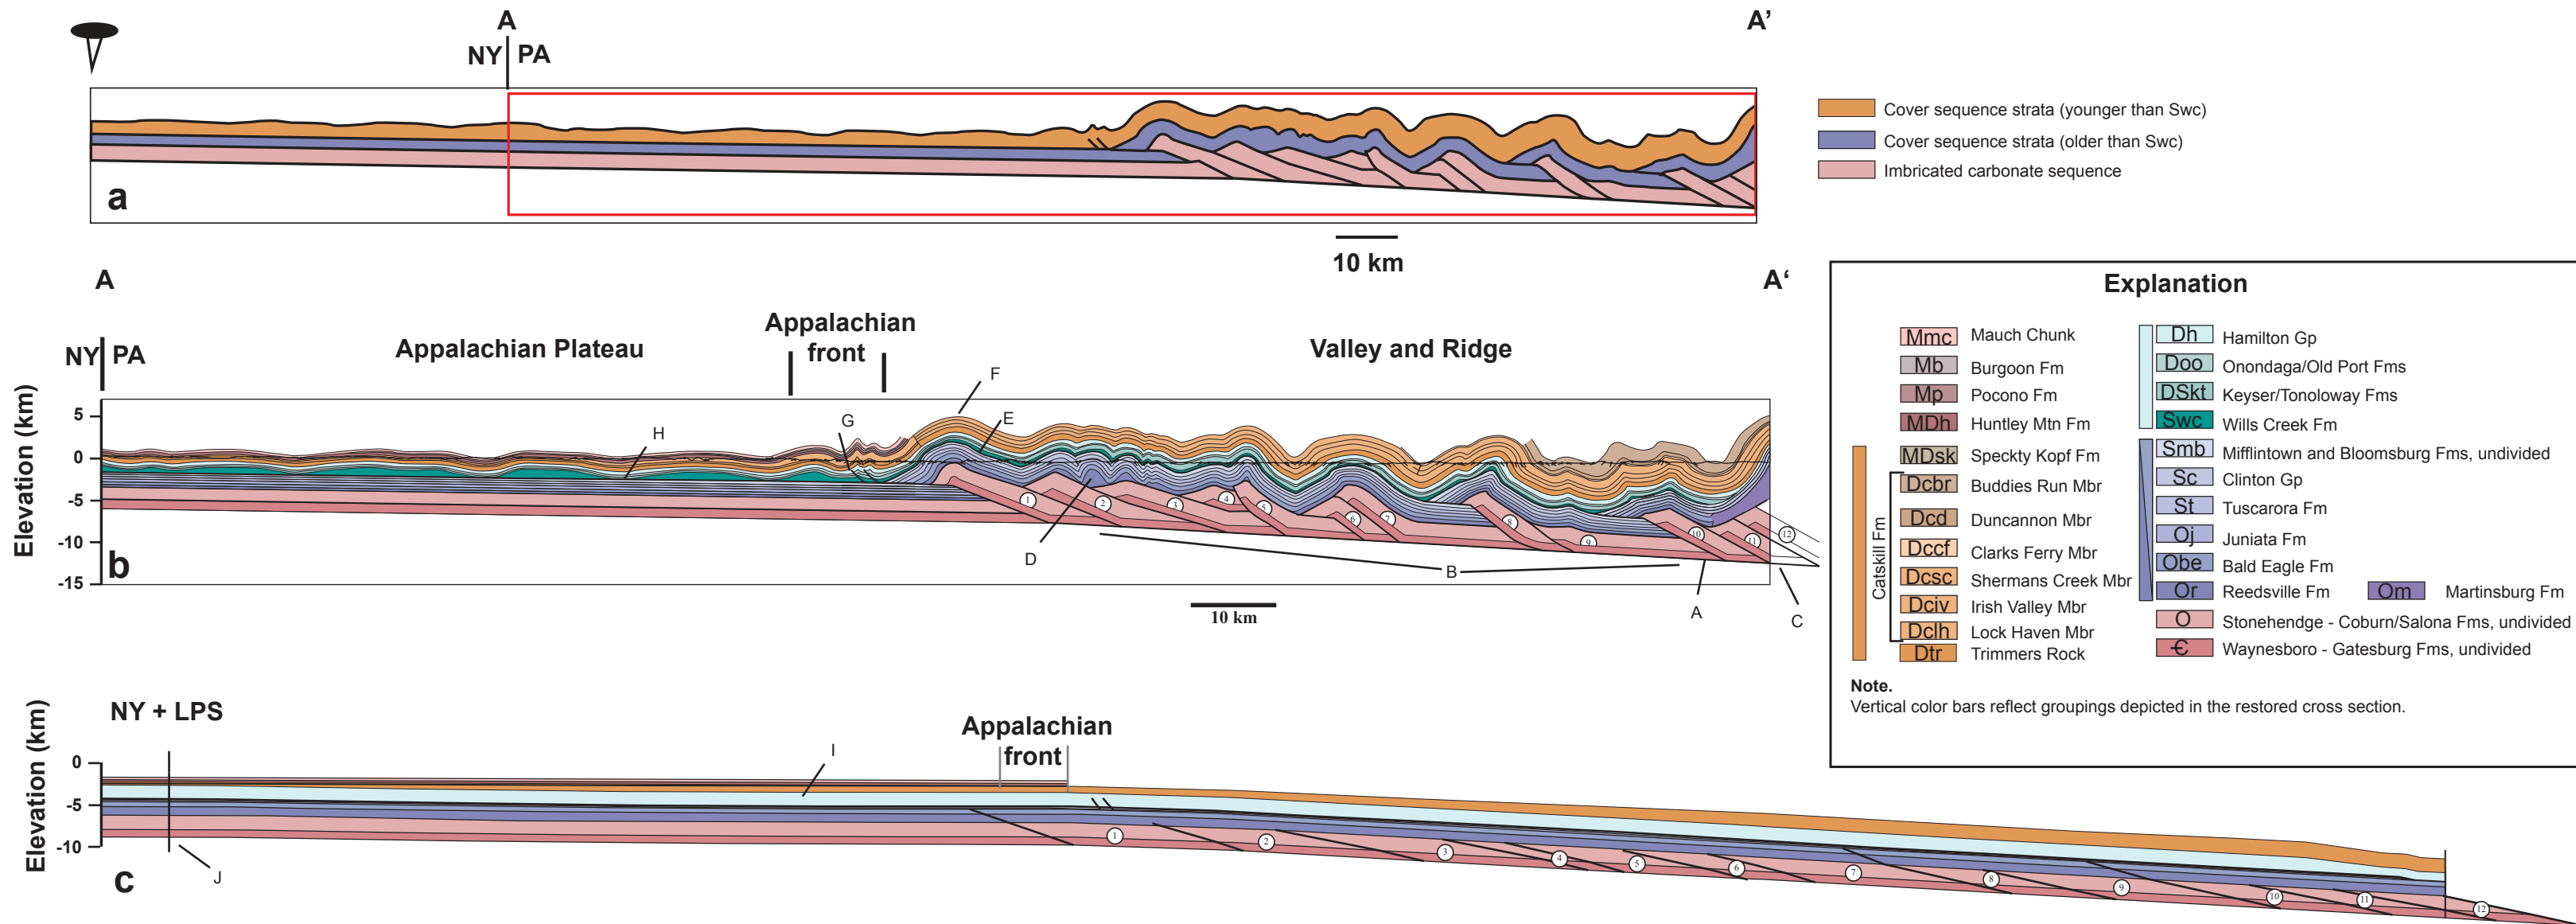

- A.** Thickness of the sedimentary package above the basement and 3° slope of basement (top of Cambrian Waynesboro Formation) determined from industry seismic reflection lines (Gwinn, 1970; Beardsley and Cable, 1983; Scanlin and Engelder, 2003a).
- B.** Duplexing of Cambrian-Ordovician carbonates beneath the Valley and Ridge are inferred to fill space between the sole thrust and the roof thrust in the Ordovician Reedsville Formation. Duplexes are positioned such that the hinge zones of horses correspond with the positions of first-order anticlines on the surface, as per the fault-bend model (Suppe, 1983).
- C.** Duplexes 11 and 12 fill space beneath the southern most syncline in the Valley and Ridge where the fold-thrust belt is yielding to a different style of deformation dominated by extensive pressure solution and ≥50% LPS in the Ordovician Martinsburg Fm. (i.e., Wright and Platt, 1982).
- D.** Bedding thickness variations within the Ordovician Reedsville Fm are limited to the thickness necessary to satisfy map scale constraints. Thomas (2001, 2007) documents similar thickness variations from seismic reflection lines in the southern Appalachians of Alabama.
- E.** Detachment at the base of the Silurian Wills Creek Fm based upon field observations (i.e., Nickelsen, 1986; Klawon, 1994). The Wills Creek detachment feeds displacement from horses 8 and 10 onto the detachment in the Silurian Salina Group on the Appalachian Plateau (i.e., Prucha, 1968; Wiltchko and Chapple, 1977; Davis and Engelder, 1985).
- F.** Nittany Anticlinorium
- G.** Location and depth of thrust faults in fault-propagation anticlines are inferred to accommodate shortening in cores of both anticlines.
- H.** Bed thickness variations on the Appalachian Plateau vary in the plastic Salina evaporite group (i.e., Prucha, 1968; Wiltchko and Chapple, 1977).
- I.** Bed thickness variations in the predominately folded sequence are constrained by local stratigraphic studies and regional scale correlations (i.e., Ayrton, 1963; Colton, 1963; Hoskins et al., 1963; Sutton, 1963; Gwinn, 1964; Dyson, 1967; Faill and Wells, 1974; Hoskins, 1976; Faill et al., 1977, 1978; Berg and Edmunds, 1979; Wells and Bucek, 1980; Inners, 1981, 1997; Berg et al., 1983, 1993; Epstein, 1986; Edmunds, 1993, 1996).
- J.** Position of the New York State line in the restored section assuming 13% LPS along the length the of the cross section from the pin line at the northern end of the line of section (Figure 1).
